# Supplementary material for: TRPM4 Expression During Postnatal Developmental of Mouse CA1 Pyramidal Neurons
Source: PubMed Central journal article supplement (PMC8113704; doi:10.3389/fnana.2021.643287), 2021-04-28
Supplement: Table_1.pdf [file Table_1.pdf]

## Supplementary Table 1

**Table 1**

List of antibodies

| Antibody                                             | Isotype | Dilution | Final [ ],<br>µg/mL | Source                     | Type | Catalog# | RRDI        | Purification |
|------------------------------------------------------|---------|----------|---------------------|----------------------------|------|----------|-------------|--------------|
| Mouse anti-TRPM4                                     | IgM     | NDS      |                     | Neuromab                   | M    | 73-501   | AB_2716758  | none         |
| Mouse anti-Ankyrin G                                 | IgG2a   | 1:100    | 8                   | Neuromab                   | M    | 75-146   | AB_10673030 | AP           |
| Rabbit anti-MAP2                                     | IgG     | 1:300    | 3                   | Abcam                      | P    | ab32454  | AB_776174   | AP           |
| Alexa Fluor 488 conjugated<br>goat anti-mouse IgM    | IgG     | 1:2000   | 1                   | ThermoFisher<br>Scientific | P    | A21042   | AB_2535711  | AP           |
| Alexa Fluor 546 conjugated<br>goat anti-mouse IgG2a  | IgG     | 1:2000   | 1                   | ThermoFisher<br>Scientific | P    | A21133   | AB_2535772  | AP           |
| Alexa Fluor 546 conjugated<br>donkey anti-rabbit IgG | IgG     | 1:2000   | 1                   | ThermoFisher<br>Scientific | P    | A10040   | AB_2534016  | AP           |

NDS: Non-diluted supernatant

M: Monoclonal

P: Polyclonal

AP: Affinity purified
